# Supplementary material for: The Anti-Inflammatory Effects of Cannabis Sativa Extracts on LPS-Induced Cytokines Release in Immune and Non-Immune Cells in Vitro
Source: Preprints.org preprint supplement (doi:10.20944/preprints202305.1512.v1), 2023-05-22

## Supplementary Materials

### The Anti-inflammatory Effects of Cannabis sativa Extracts on LPS-Induced Cytokines Release in Immune and Non-immune Cells in Vitro

Mariia Zaiachuk <sup>†</sup>, Santosh V Suryavanshi <sup>†,\*</sup>, Nazar Pryimak, Igor Kovalchuk <sup>\*</sup>, Olga Kovalchuk <sup>\*</sup>

**Figure S1. The trypan blue cell viability assay photos were taken 3 minutes after staining with trypan blue using LUNA automated cell counter**

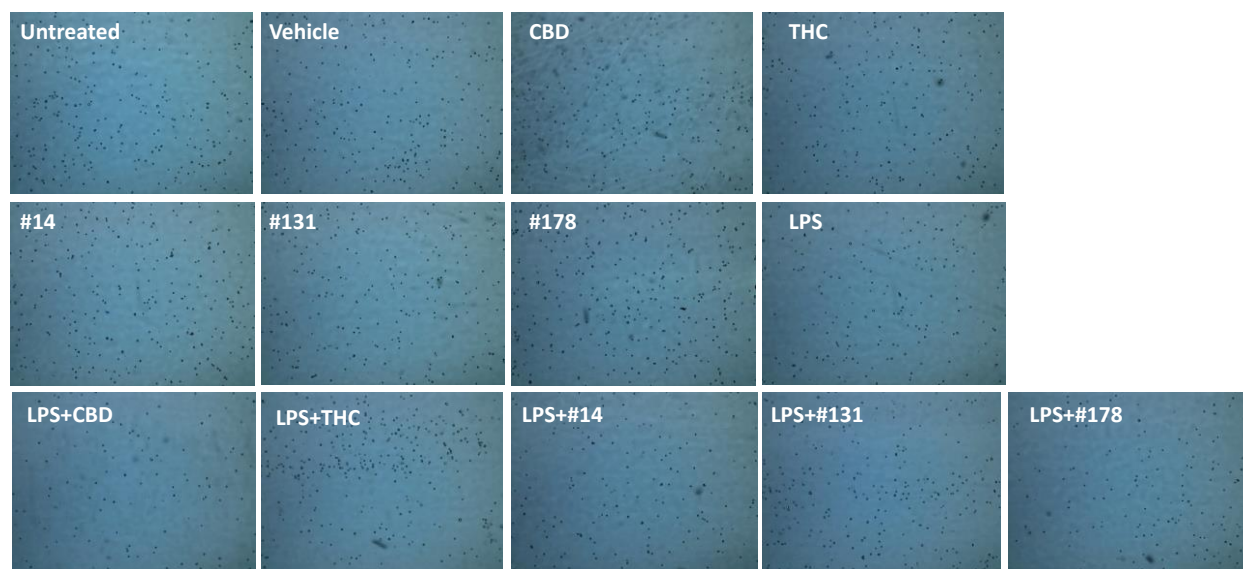

**Figure S2. Comparison of cytokine induction between CBD and THC or extracts.** A – IL-1 $\beta$ ; B – IL-6; C – TNF- $\alpha$ ; D – IL-10; E – MCP-1; F – IL-8. Results are presented as mean of calculated concentration [pg/ml]  $\pm$  SD. Statistical analysis was performed by ANOVA followed by Tukey post-hoc multiple comparison test. Significant differences between groups are marked with: \* $p < 0.05$ , \*\* $p < 0.01$ , \*\*\* $p < 0.001$ , \*\*\*\* $p < 0.0001$ .

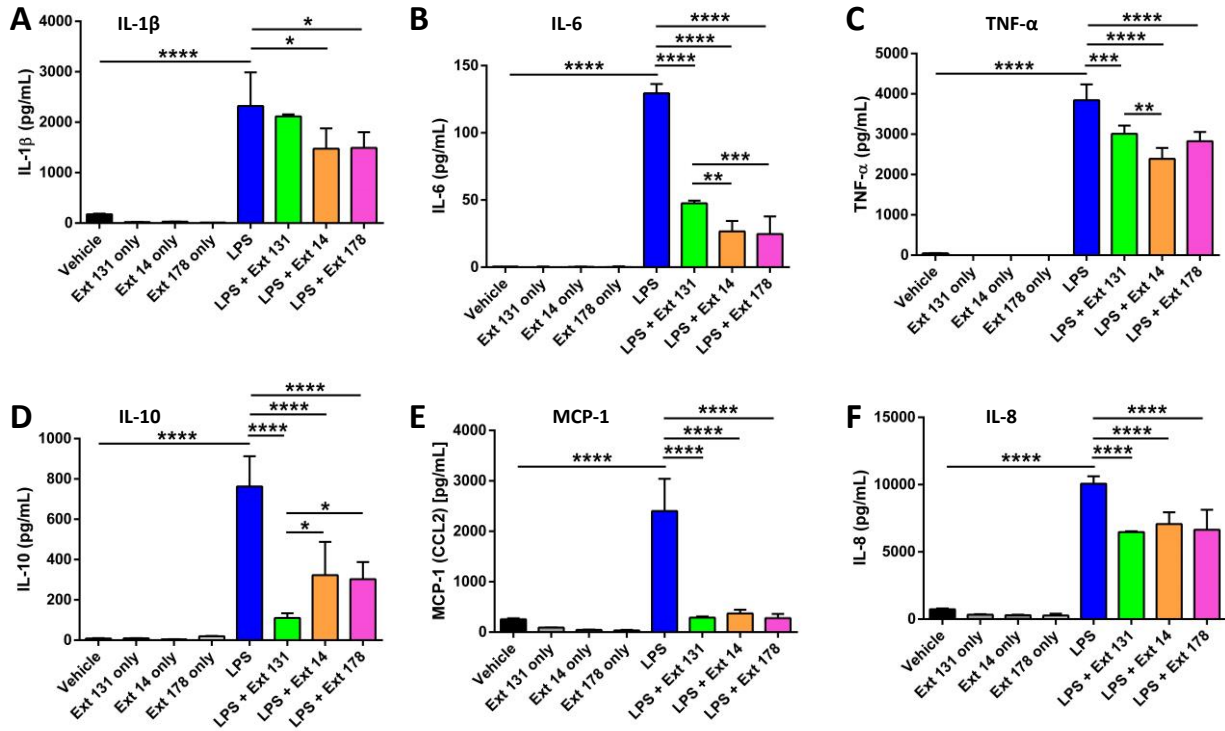

Supplement: Supplementary file 1 [file supplementary]
